# Supplementary material for: Flower-like Ni–Co hydroxides on Ni foam for high-performance supercapacitor applications
Source: Royal Society of Chemistry journal article supplement (doi:10.1039/c7nj04663d), 2018-01-01
Supplement: c7nj04663d1.pdf [file c7nj04663d1.pdf]

**Supporting Information for**  
**Flower-like Ni-Co hydroxide on Ni foam for high-performance**  
**supercapacitor application**

Jianxia Gou <sup>a</sup>, Shengli Xie <sup>a\*b</sup> and Chenguang Liu <sup>b</sup>

<sup>a</sup> Department of Chemical Engineering, Binzhou University, Binzhou 256603,  
Shandong, China

E-mail: shenglixie@126.com

<sup>b</sup> State Key Laboratory of Heavy Oil Processing, China University of Petroleum,  
Qingdao, 266580, Shandong, China.

**Table S1.** The ratio of the Ni, Co and P of the as-synthesized precursor/NF

determined by ICP-OES

| Sample       | Co   | Ni | P   |
|--------------|------|----|-----|
| precursor/NF | 1.06 | 1  | 1.4 |

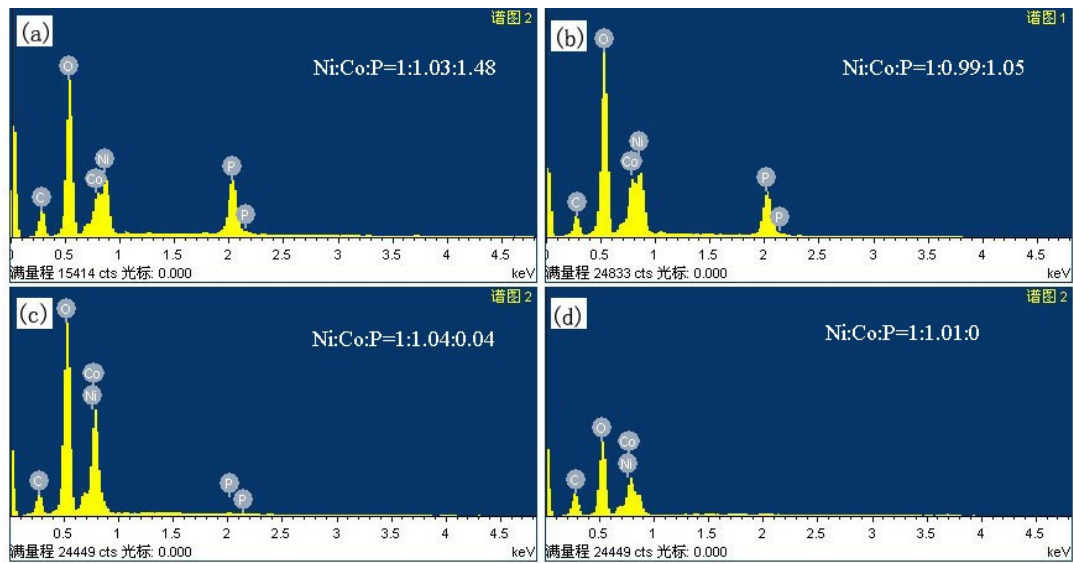

**Figure S1.** EDS patterns of (a) precursor/NF, (b) NiCo-T24 h/NF, (c) NiCo-T48 h/NF, and (d) NiCo-T72 h/NF

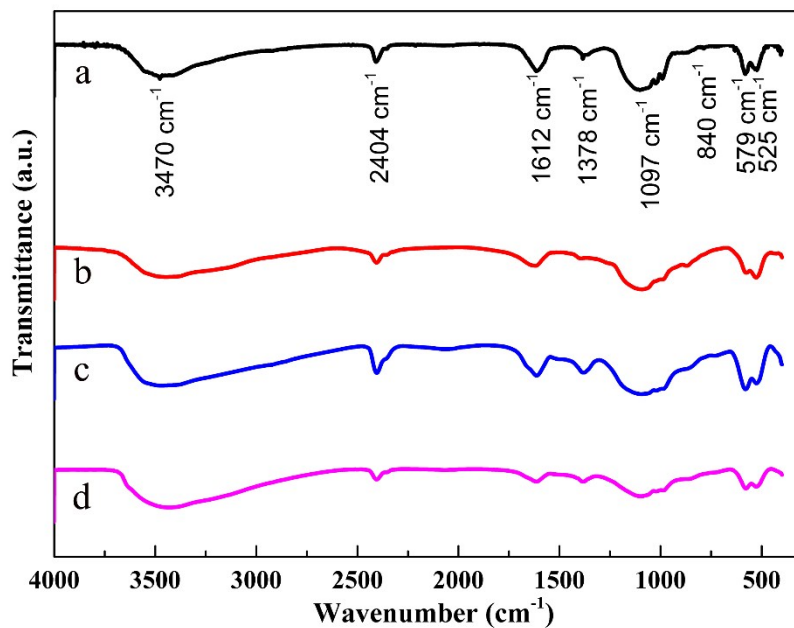

**Figure S2.** FTIR spectra of samples: (a) precursor/NF, (b) NiCo-T24 h/NF, (c) NiCo-T48 h/NF, and (d) NiCo-T72 h/NF.

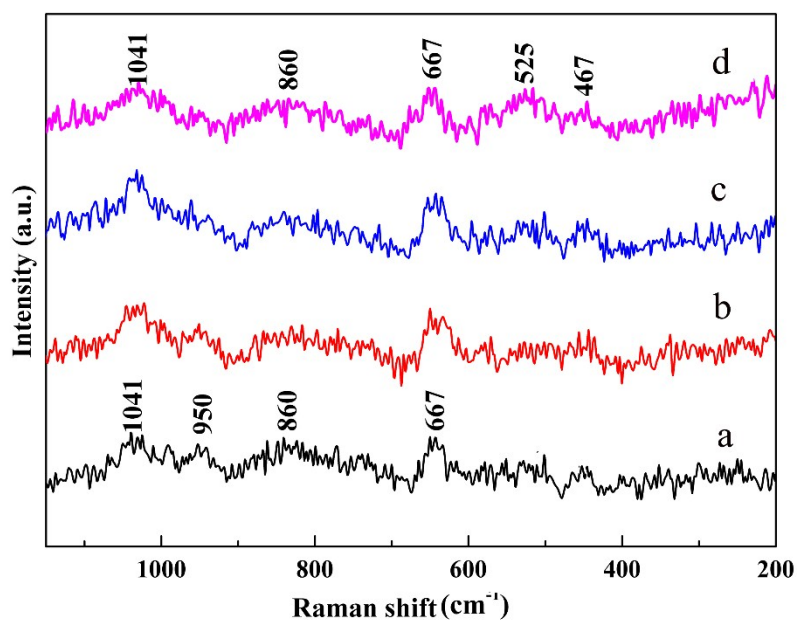

**Figure S3.** Raman spectra of samples: (a) precursor/NF, (b) NiCo-T24 h/NF, (c) NiCo-T48 h/NF, and (d) NiCo-T72 h/NF.

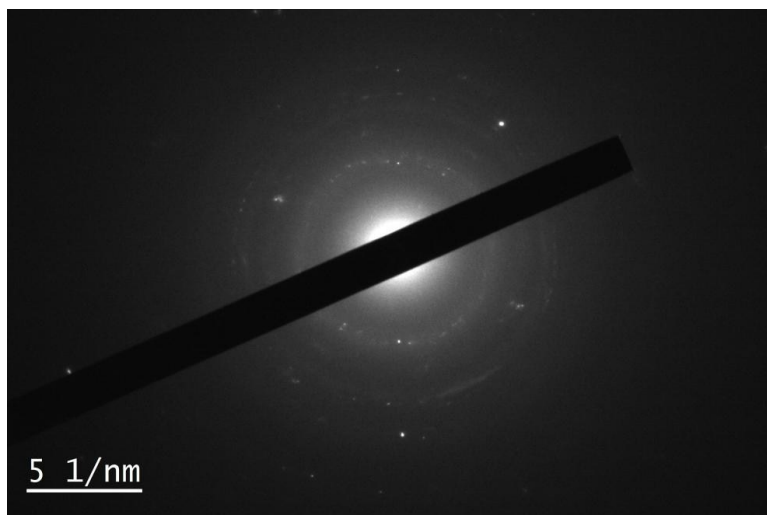

**Figure S4.** SAED of NiCo-T48 h/NF

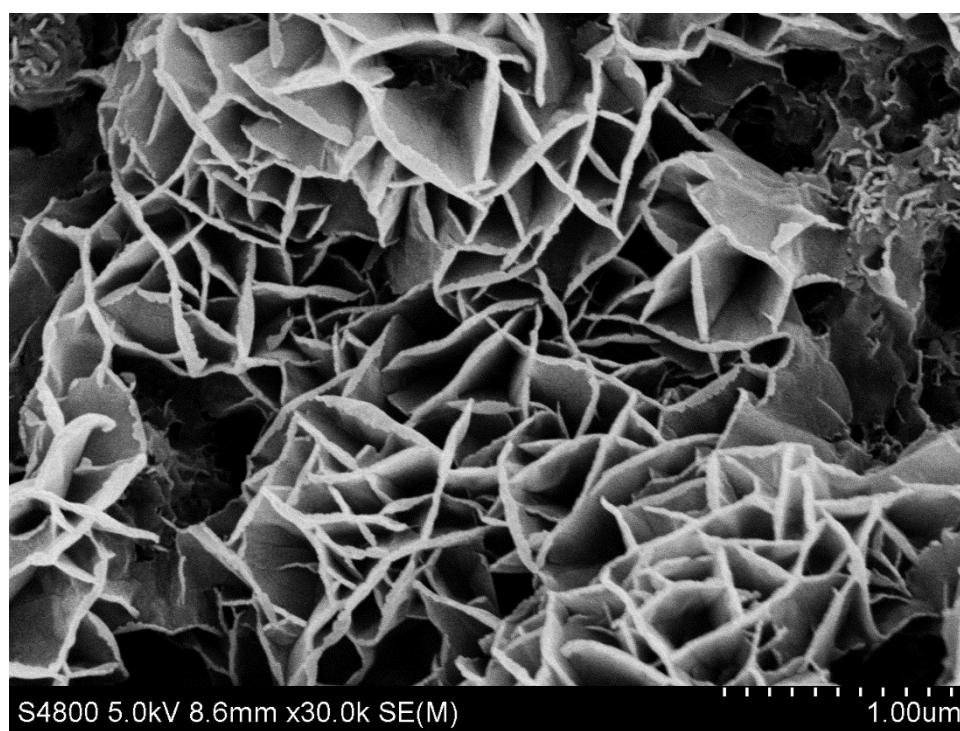

**Figure S5.** SEM image of the NiCo-T48h/NF after 5000 cycles
